# Supplementary material for: Trends in bednet ownership and usage, and the effect of bednets on malaria hospitalization in the Kilifi Health and Demographic Surveillance System (KHDSS): 2008–2015
Source: BMC Infect Dis. 2017 Nov 15;17:720. doi: 10.1186/s12879-017-2822-x (PMC5688631; doi:10.1186/s12879-017-2822-x)
Supplement: Supplementary file 4 — Sensitivity analysis: Incidence of malaria hospitalization among children < 5 years in the KHDSS by pattern of reported bednet ownership and usage, defining malaria three different ways. (XLS 37 kb) [file 12879_2017_2822_MOESM4_ESM.xls]

## Sheet: Additional file 4
Additional file 4. Sensitivity analysis: Incidence of malaria hospitalization among children <5 years in the KHDSS by pattern of reported bednet ownership and usage, defining malaria three different ways
Outcome	Factor	Person-years	Malaria admissions, n	Rate per 1,000	Unadjusted HR (95% CI)	HR† (95% CI)
Any malaria parasitemia	Bednet owners	75129	259	3.45	0.67	0.68
	Bednet non-owners	21556	111	5.15	(0.54, 0.84)	(0.54, 0.86)
	Bednet use last night	70021	236	3.37	0.68	0.68
	Bednet non-use	23096	115	4.98	(0.54, 0.85)	(0.54, 0.87)
Any malaria parasitemia + fever	Bednet owners	75137	186	2.48	0.74	0.74
	Bednet non-owners	21558	72	3.34	(0.56, 0.97)	(0.55, 0.99)
	Bednet use last night	70028	169	2.41	0.73	0.73
	Bednet non-use	23098	76	3.29	(0.56, 0.96)	(0.55, 0.97)
Parasitemia >5,000	Bednet owners	75135	207	2.76	0.69	0.69
	Bednet non-owners	21558	86	3.99	(0.54, 0.89)	(0.53, 0.90)
	Bednet use last night	70027	187	2.67	0.68	0.67
	Bednet non-use	23098	91	3.94	(0.53, 0.87)	(0.52, 0.88)
n = number of children admitted with malaria, HR = Hazard Ratio, CI = confidence interval
†The HR was adjusted for sex, age, location of residence and period of the survey
